# Supplementary material
Source: Royal Society of Chemistry journal article supplement (https://www.rsc.org/suppdata/dt/1999/2759/902746gcap.doc)
Supplement: Supplementary file 1 [file 902746gcap.doc]

**Supplemantary Information: Figure captions**

Fig. 1a: Spectral changes observed for the electrochemical reduction of FeIII(TPPS) to FeII(TPPS) in nitrogen saturated solution. Experimental conditions: [FeIII(TPPS)] ~ 7x10-4 M; pH = 4 (potassium hydrogenphtalate buffer); T = 25 C; [Na2SO4] = 0.6 M.

Fig. 1b: Spectral changes observed for the electrochemical oxidation of FeIII(TPPS) to FeIII(TPPS+) in nitrogen saturated solution. Experimental conditions: [FeIII(TPPS)] ~ 7x10-4 M; pH = 4 (potassium hydrogenphtalate buffer); T = 25 C; [Na2SO4] = 0.6 M.

Fig. 2a: Spectral changes observed for the redox cycle between the FeIII(TPPS) dimer and sulfite in the presence of air. Experimental conditions: [FeIII(TPPS)] = 6x10-6 M; [S(IV)] = 4x10-3 M; pH = 11; T = 25 C; I = 0.1 M; t = 0.8 s.

Fig. 2b: Absorbance-time trace for the redox cycle between the FeIII(TPPS) dimer and sulfite in basic solutions at  = 426 nm (for experimental conditions see Fig. 2a).

Fig. 3a: Spectral changes observed for the redox cycle between the FeIII(TPPS) dimer and sulfite in oxygen saturated solutions. Experimental conditions: [FeIII(TPPS)] = 6x10-6 M; [S(IV)] = 4x10-3 M; pH = 11; T = 25 C; I = 0.1 M; t = 0.2 s.

Fig. 3b: Absorbance-time traces for the redox cycle between the FeIII(TPPS) dimer and sulfite in oxygen saturated basic solutions at a)  = 405 nm and b)  = 430 nm (for experimental conditions see Fig. 3a).

Fig. 4: Absorbance-time traces for the redox cycle between the FeIII(TPPS) dimer and sulfite at  = 430 nm (FeIV(O)(TPPS+)) for different oxygen concentrations. Experimental conditions: [FeIII(TPPS)] = 6x10-6 M; [S(IV)] = 4x10-3 M; pH = 11; T = 25 C; I = 0.1 M; a) [O2] = 1.2x10-4 M; b) [O2] = 2.4x10-4 M; c) [O2] = 6x10-4 M; d) [O2] = 1.2x10-3 M.

Fig. 5: Absorbance-time traces for the redox cycle between the FeIII(TPPS) dimer and sulfite in oxygen saturated solutions at  = 430 nm (FeIV(O)(TPPS+)) for different pH values. Experimental conditions: [FeIII(TPPS)] = 6x10-6 M; [S(IV)] = 4x10-3 M; T = 25 C; I = 0.1 M; a) pH = 9.2; b) pH = 10; c) pH = 11; d) pH = 12.

Fig. 6: Absorbance-time traces for the redox cycle between the FeIII(TPPS) dimer and sulfite in oxygen saturated solutions at  = 430 nm (FeIV(O)(TPPS+)) for different sulfite concentrations. Experimental conditions: [FeIII(TPPS)] = 6x10-6 M; pH = 11; T = 25 C; I = 0.1 M; a) [S(IV)] = 1x10-3 M; b) [S(IV)] = 2x10-3 M; c) [S(IV)] = 4x10-3 M; d) [S(IV)] = 6x10-3 M; e) [S(IV)] = 8x10-3 M.

Fig. 7a: Spectral changes observed for the redox cycle between the FeIII(TPPS) dimer and sulfite in oxygen saturated solutions and in the presence of ethanol. Experimental conditions: [FeIII(TPPS)] = 6x10-6 M; [S(IV)] = 4x10-3 M; [EtOH] = 0.025 vol.%; pH = 11; T = 25 C; I = 0.1 M; t = 1.6 s.

Fig. 7b: Absorbance-time trace for the redox cycle between the FeIII(TPPS) dimer and sulfite in oxygen saturated basic solutions and in the presence of ethanol at  = 421 nm (for experimental conditions see Fig. 7a).
